# Supplementary material for: Germline de novo mutations in families with Mendelian cancer syndromes caused by defects in DNA repair
Source: Springer Nature journal article supplement (doi:10.1038/s41467-023-39248-0), 2023-06-19
Supplement: MOESM1 [file 41467_2023_39248_MOESM1_ESM.pdf]

**SUPPLEMENTARY INFORMATION**

**Supplementary Figure 1. Pedigrees of the families studied.** a) Families with parental *POLE* p.L424V germline mutation. b) Families with parental *POLD1* p.S478N germline mutation. c) Families with parental *MUTYH* germline mutations, with heterozygote and homozygote carriers distinguishable by the specific protein changes shown. d) Control families with no known mutations in DNA repair or other Mendelian disease genes. Filled symbol = affected with phenotype shown. + = germline mutation carrier, - = non-carrier. Cumulative numbers of colorectal adenomas, polyps and hyperplastic polyps (HPs) to date of study recruitment and age at that time are given where known. For cancers, the age provided is at first presentation.

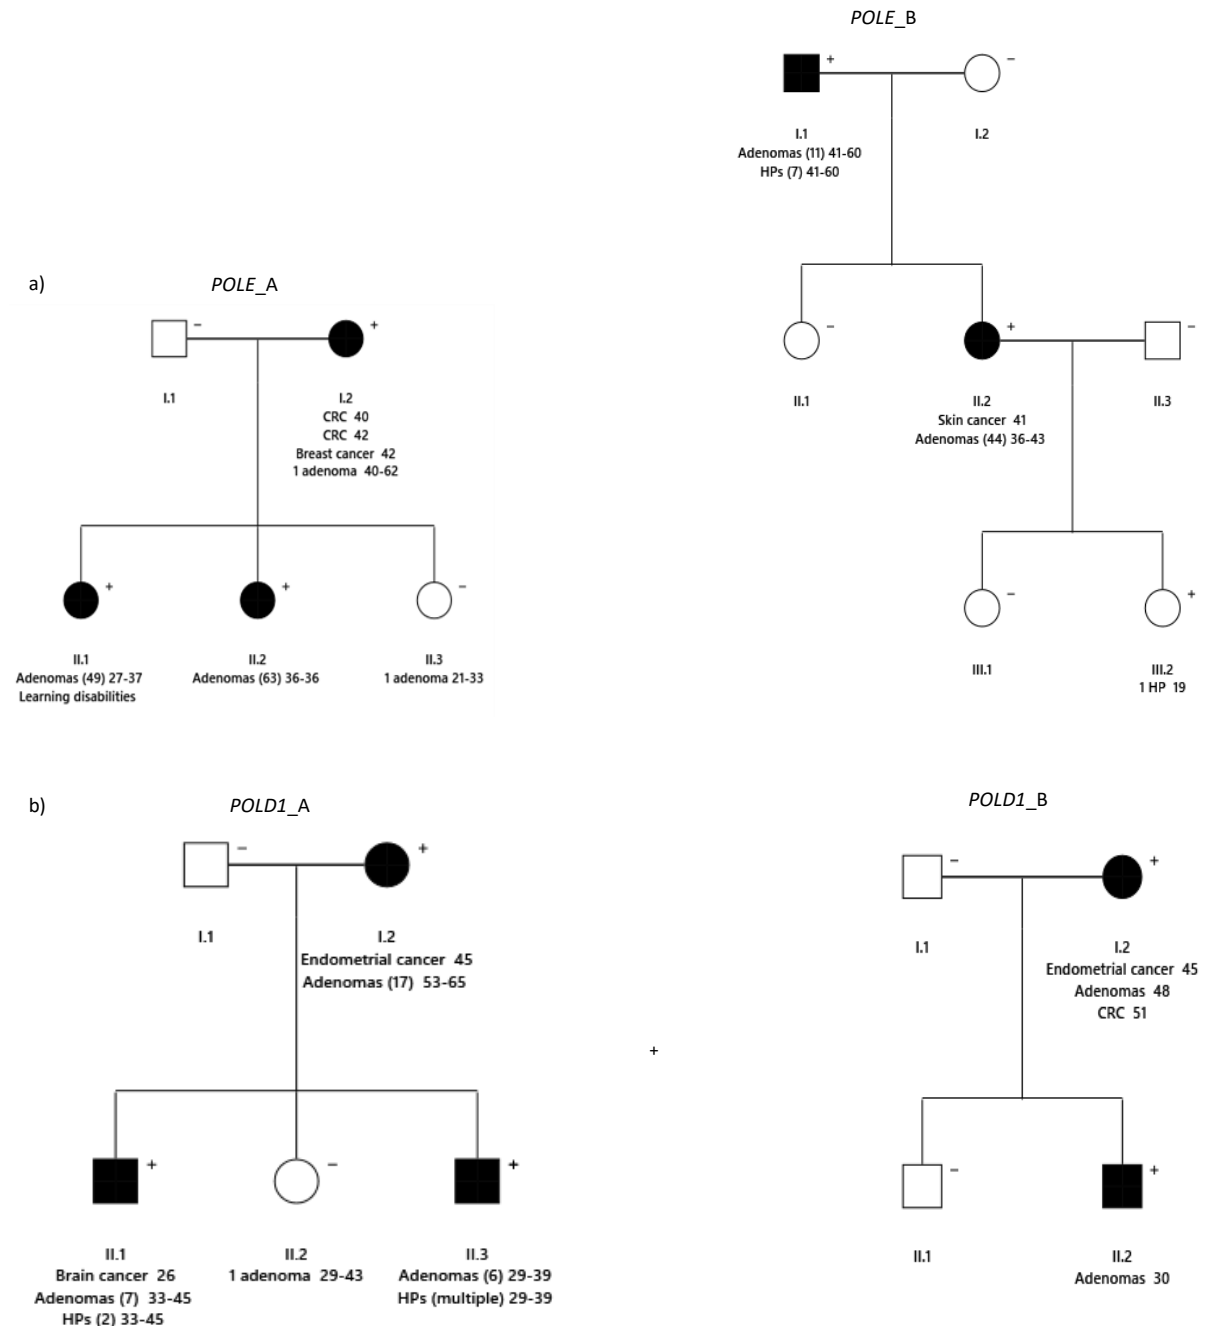

c)

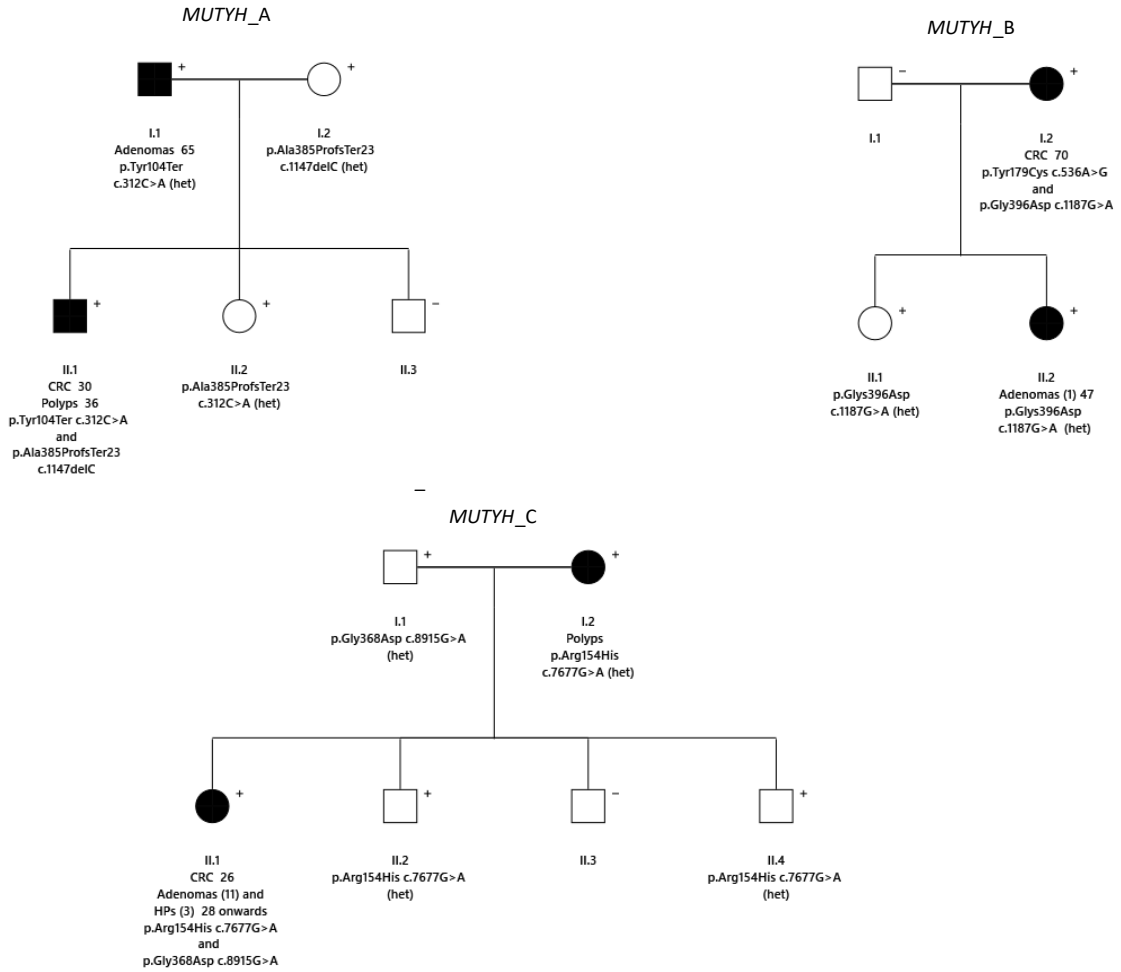

d)

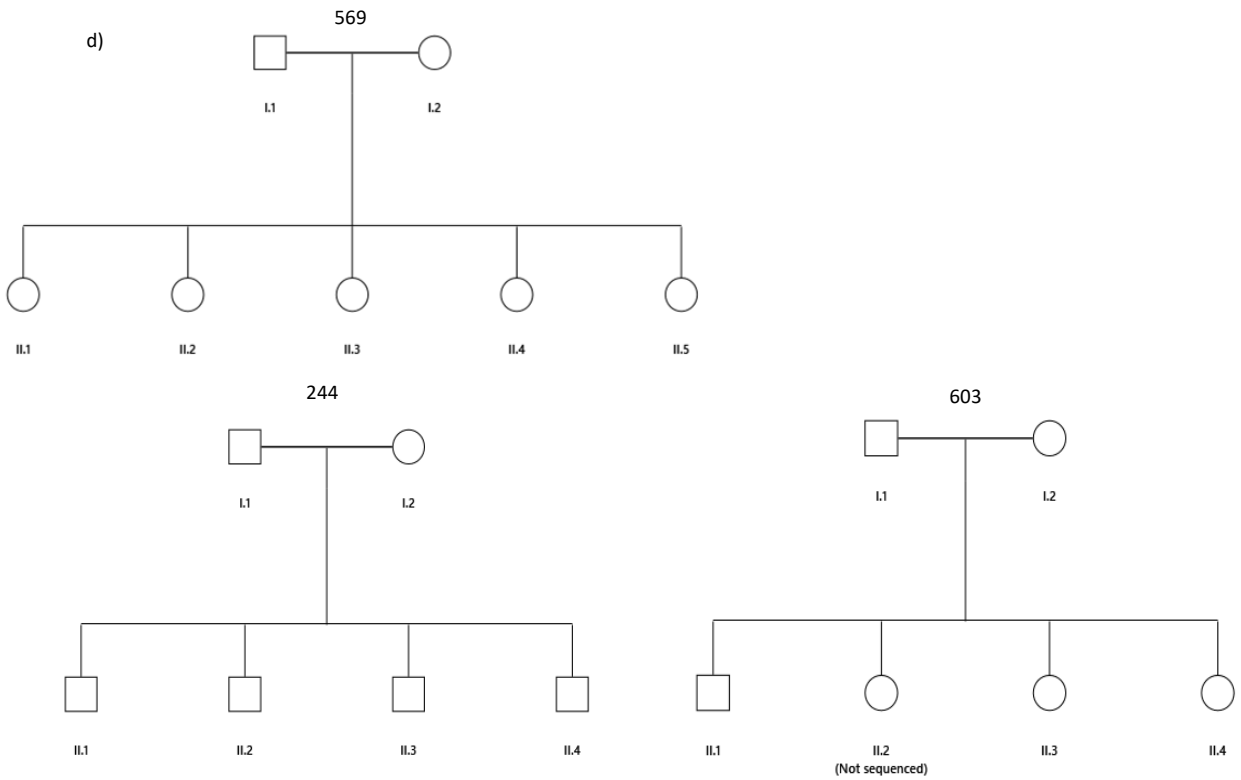

c)

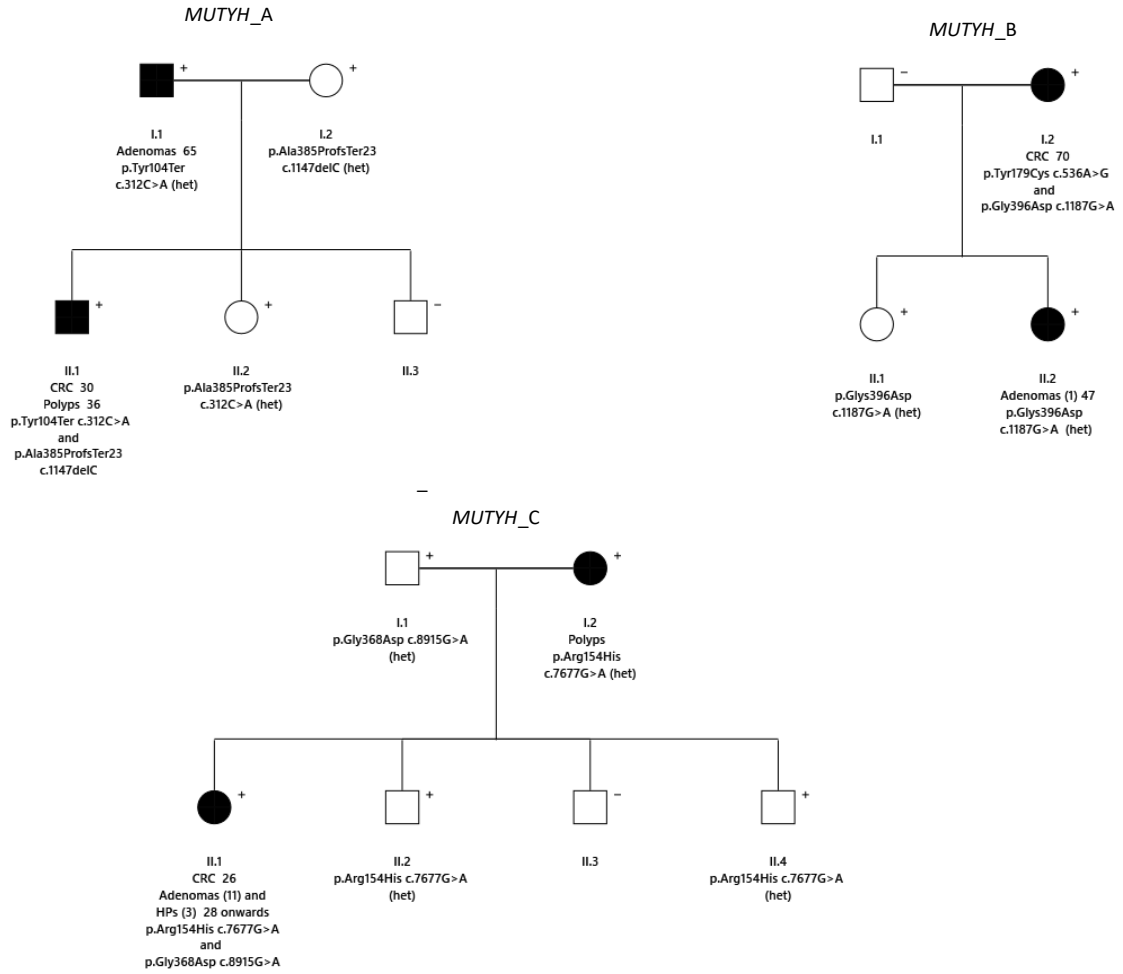

d)

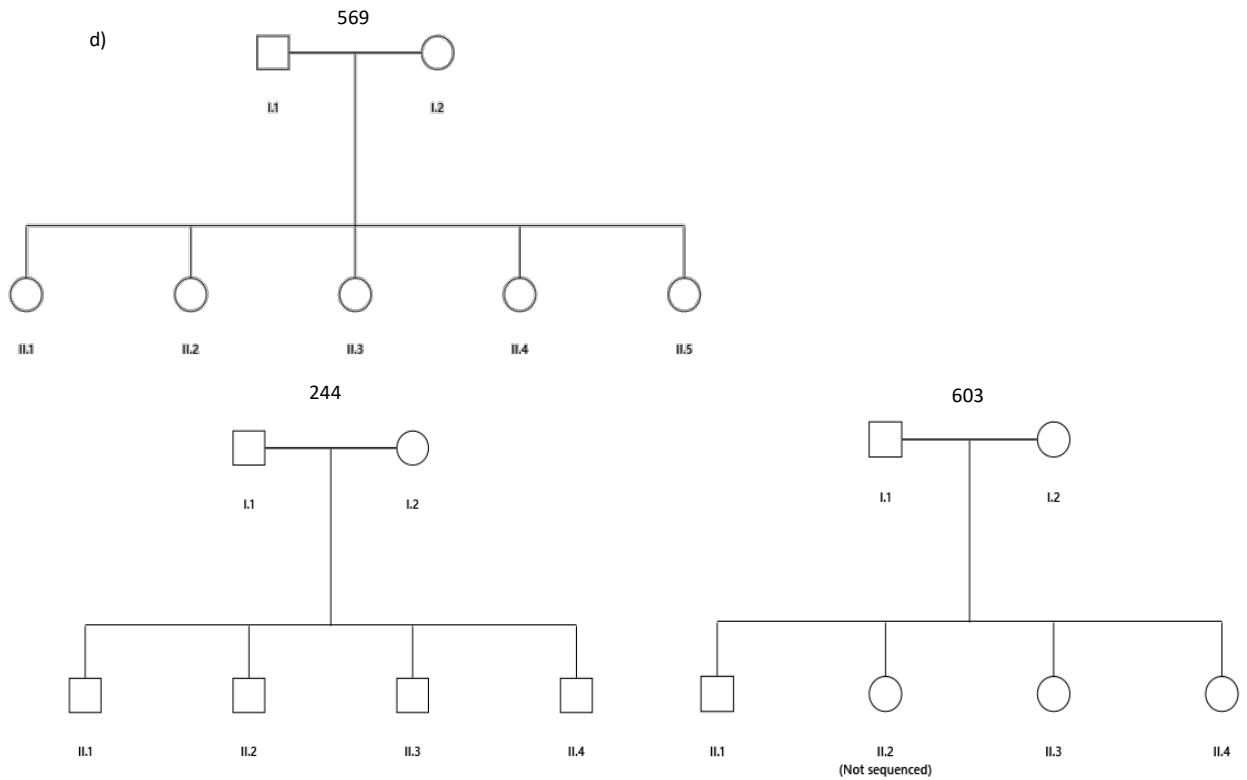

**Supplementary Figure 2. DNM assessment.** a) Workflow for filtering de novo mutations in parent-offspring trios from DeNovoGear. b) An example of a candidate de novo mutation that is validated in the IGV browser. The read alignments from top to bottom are the child's, mother's and father's. The DNM is present only in the child's reads.

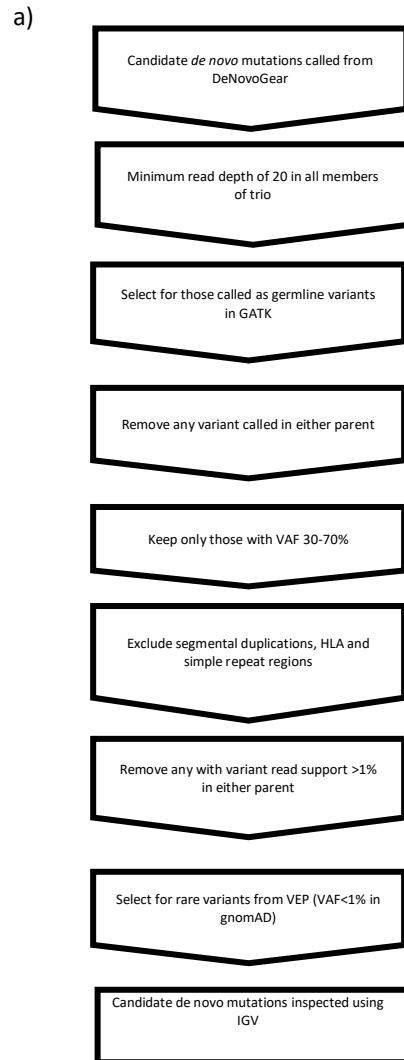

b)

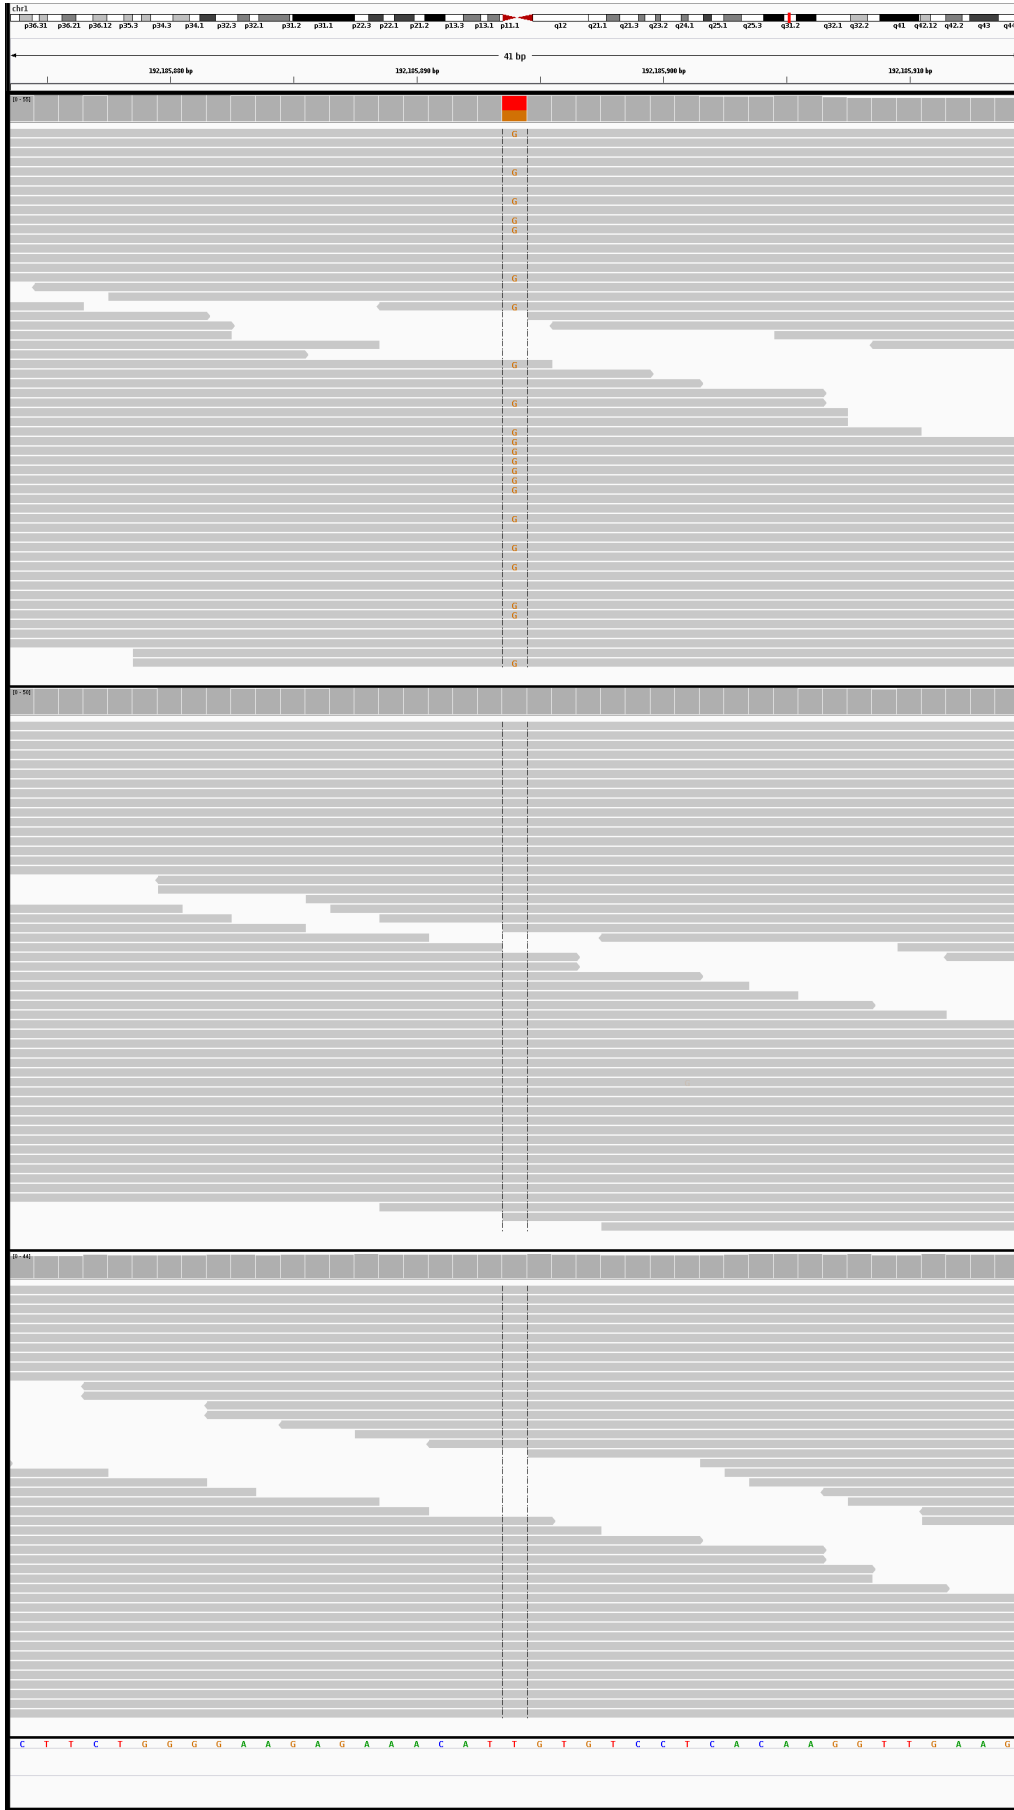

**Supplementary Figure 3. Exploration of different reference genomes.** We had used reference genome hg19/B37 (with patches) in large part to achieve comparability with previous studies. Given the improved coverage of hg38/B38, we re-mapped and called three individuals from family POLE\_A using B38. The results are shown below for SBS DNMs (B37 blue, B38 red).

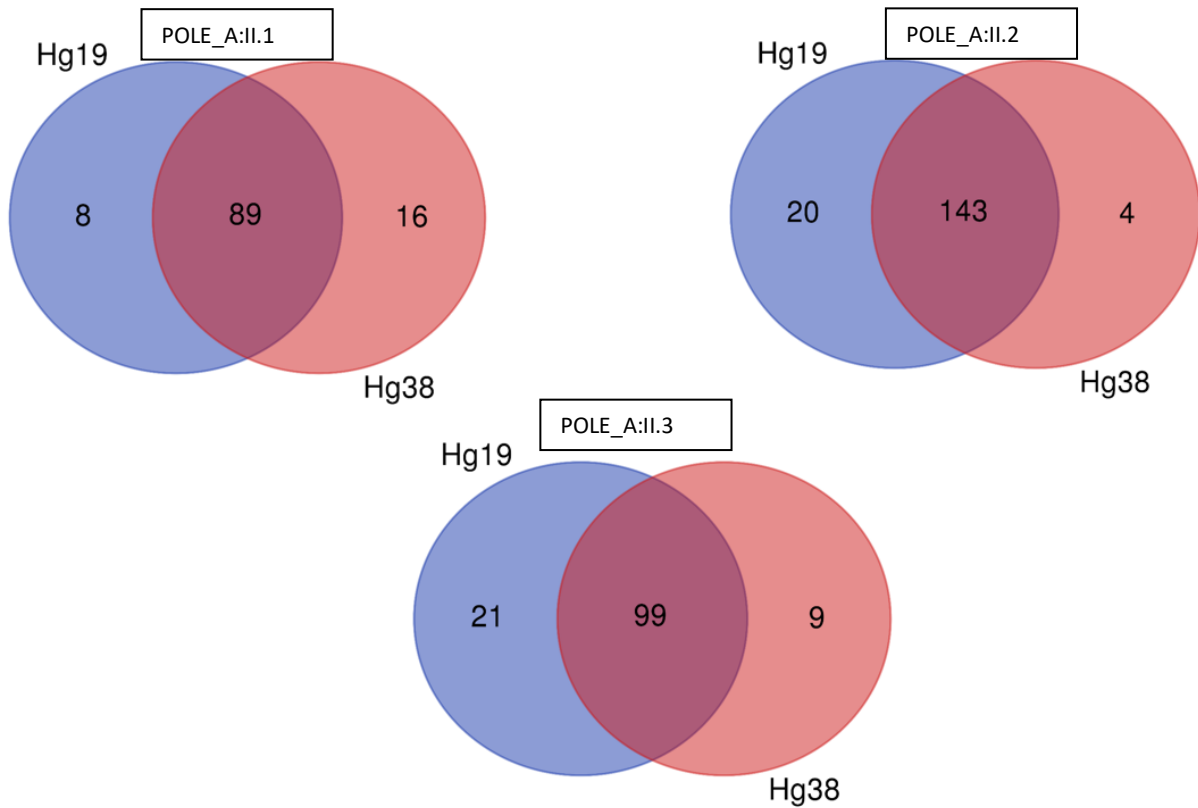

On average, the number of DNMs identified by B38 was similar to B37 (within 10% either way), with 80% overlap of specific DNMs. There was no clear DNM increase in the B38 analysis in this small sample. Visual inspection to check and assess the DNMs suggested that the differences between DNM identification between reference builds resulted from quality score differences, presumably reflecting the interplay between our sequencing errors and errors in the reference sequences.

**Supplementary Figure 4. Activities of SBS, DBS and ID mutation signatures of all families.** a) All POLE families; b) POLE\_A; c) POLE\_B all; d) POLE\_B generation II; e) POLE\_B generation III; f) All POLD1 families; g) POLD1\_A; h) POLD1\_B; i) All MUTYH families; j) MUTYH\_A; k) MUTYH\_B; l) MUTYH\_C; m) All Control families; n) Control 244; o) Control 569; p) Control 603.

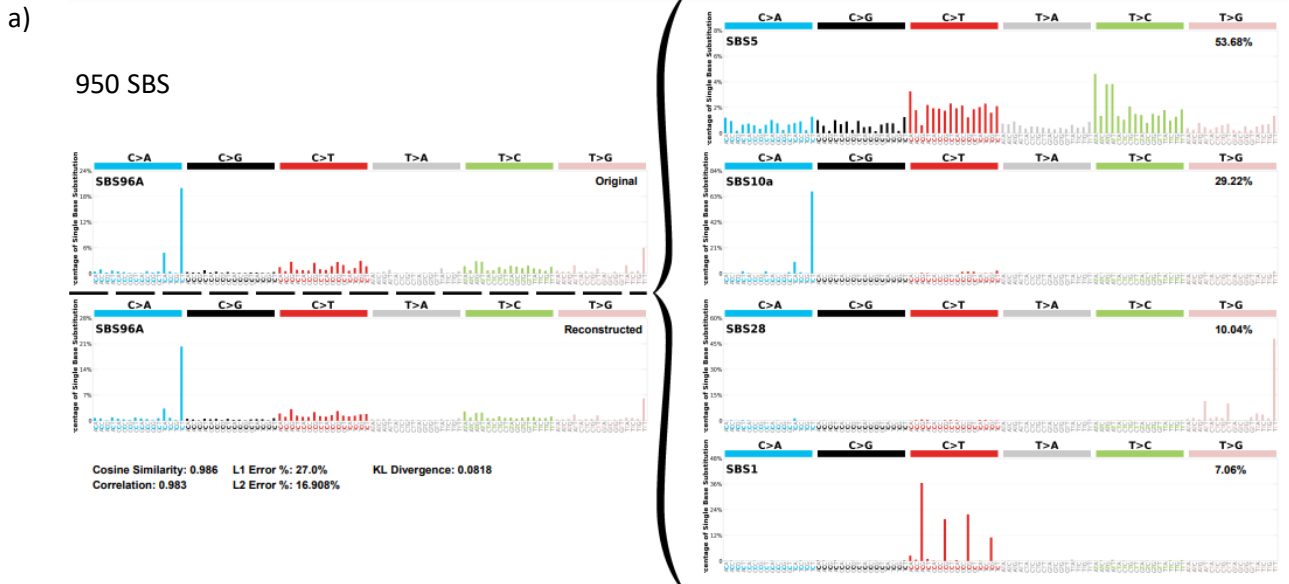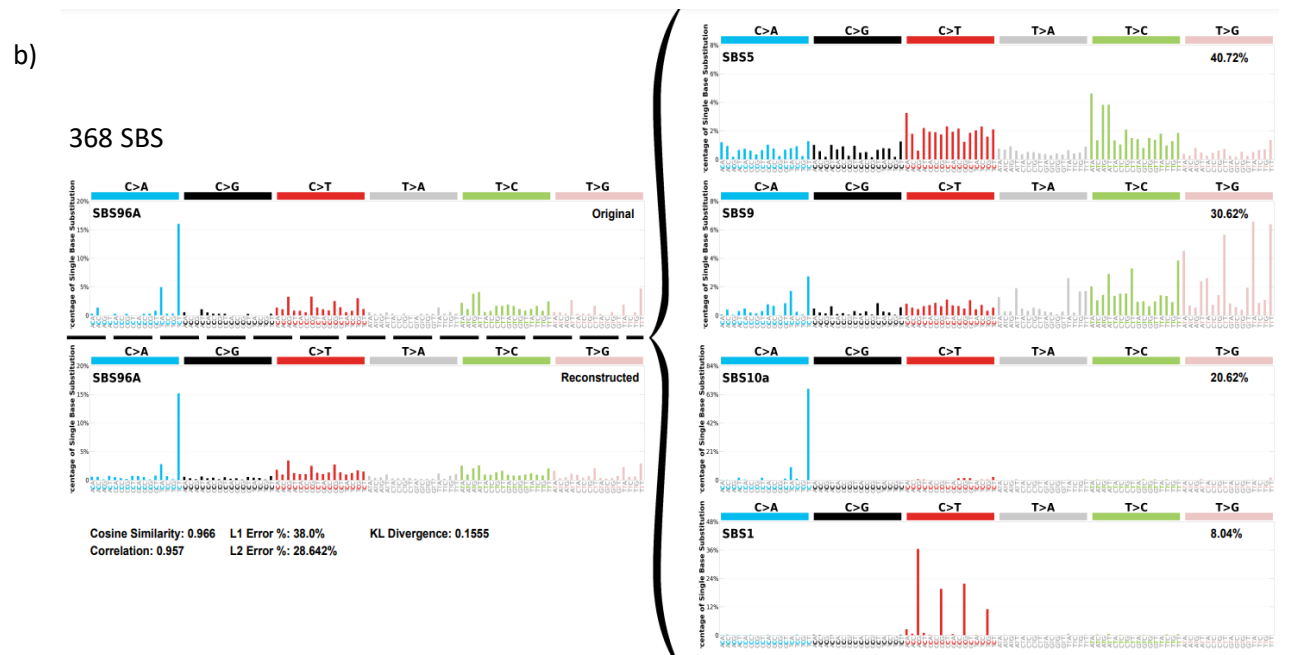

c)

582 SBS

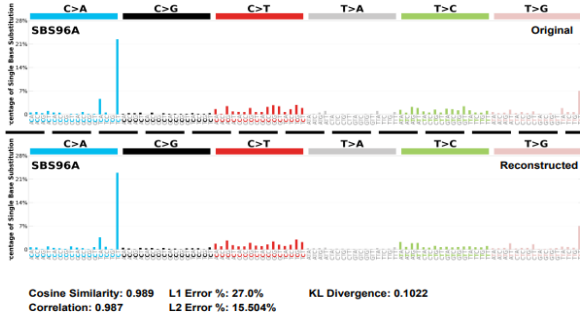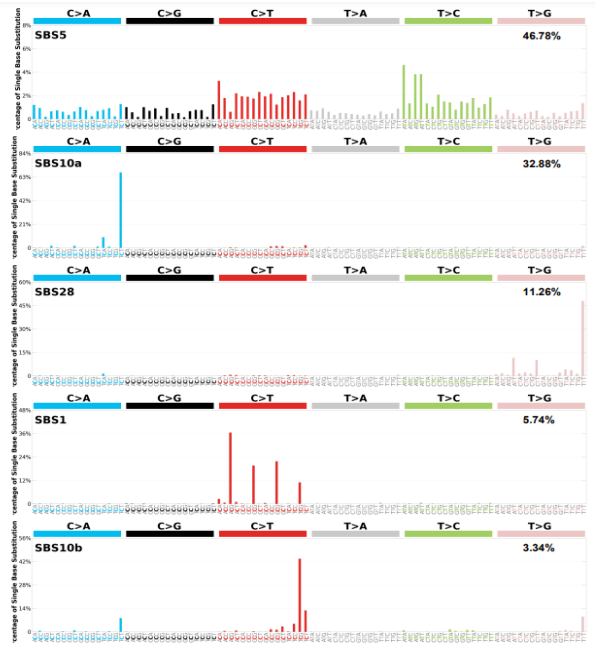

d)

389 SBS

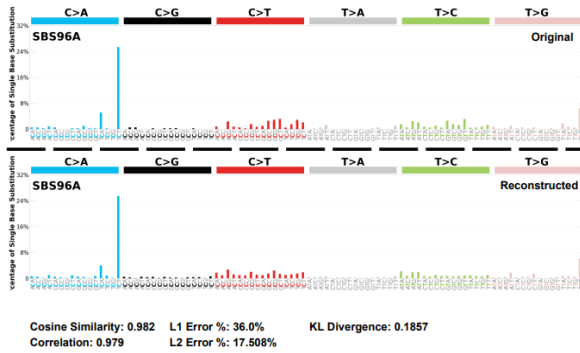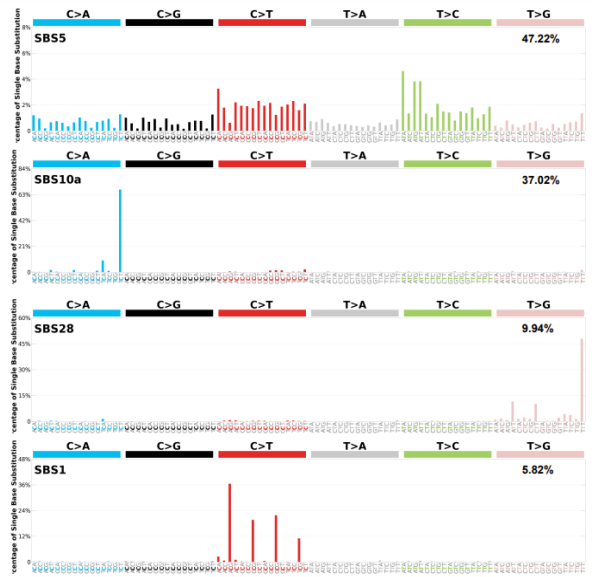



e)

193 SBS

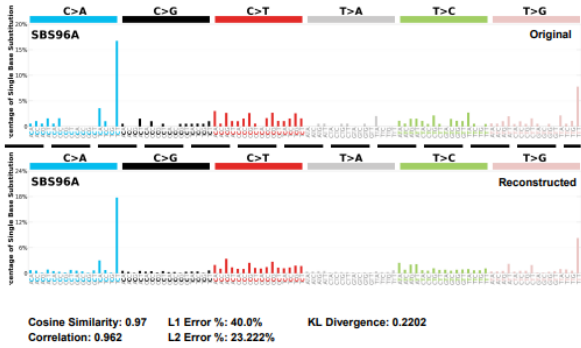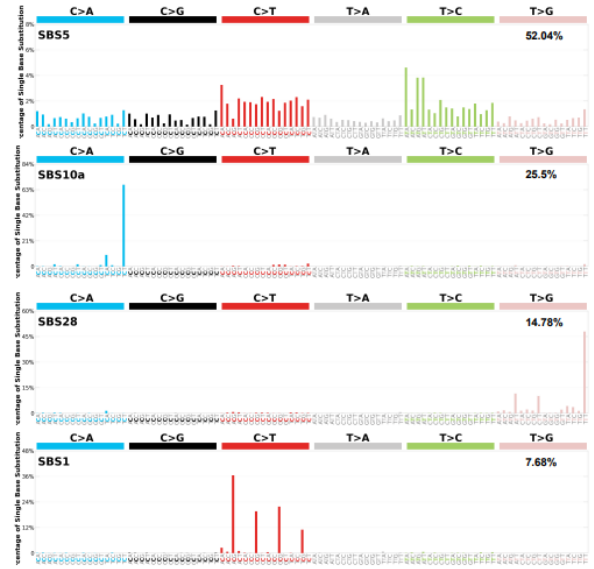

f)

326 SBS

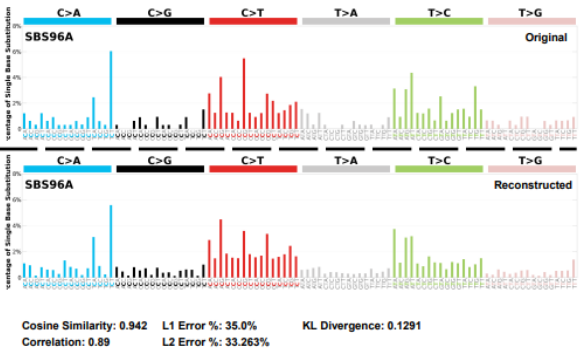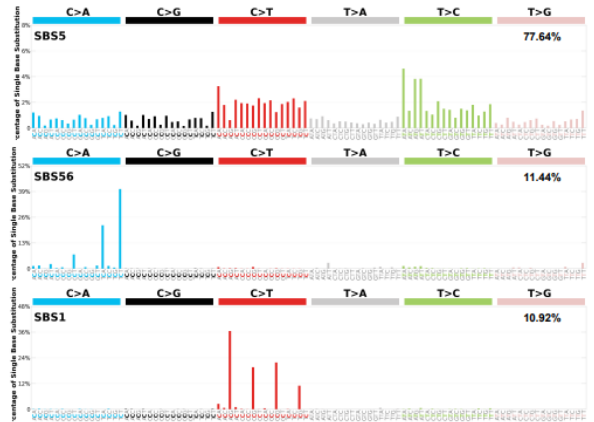

g)

181 SBS

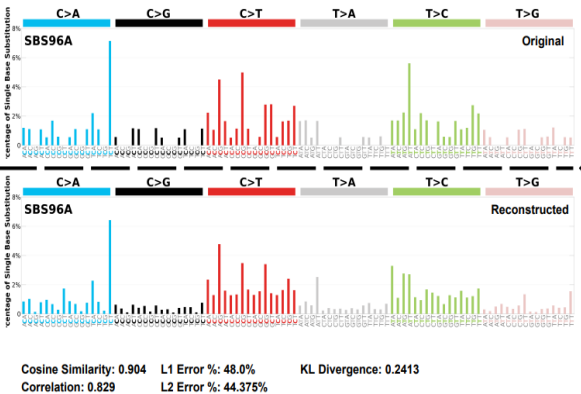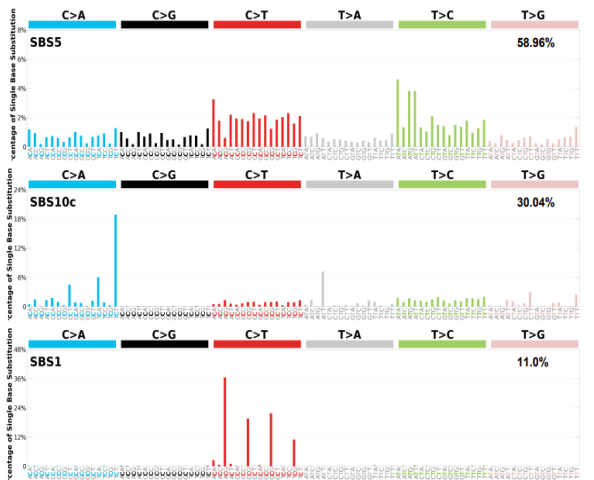

h)

145 SBS

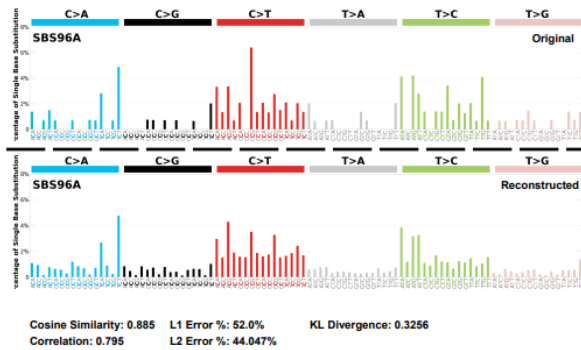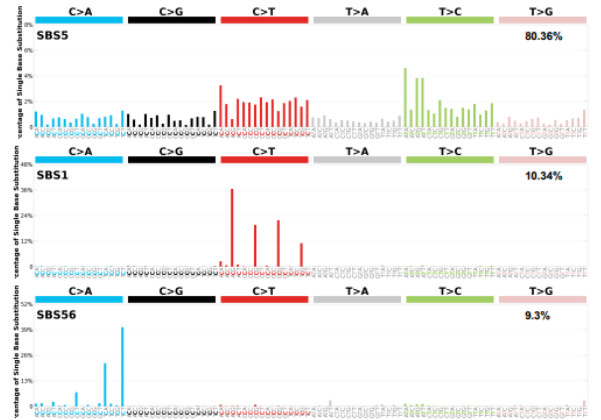

i)

475 SBS

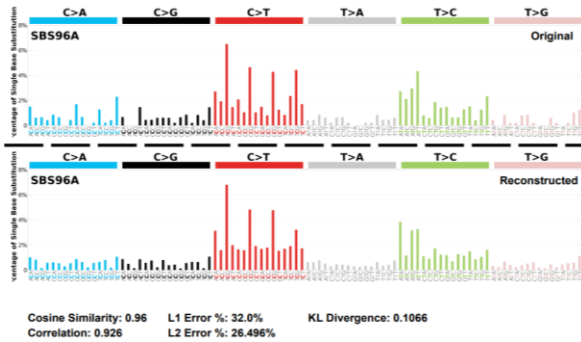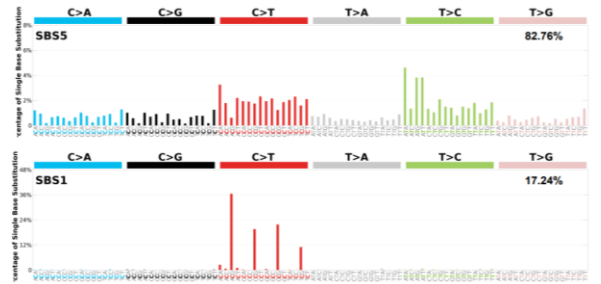

j)

166 SBS

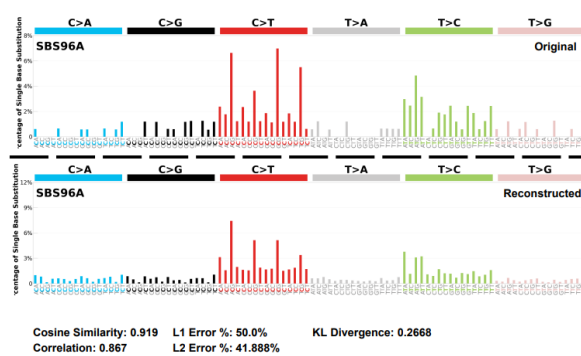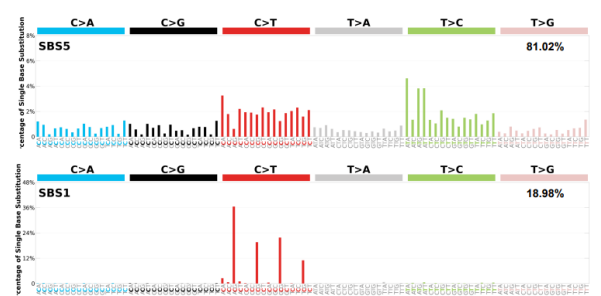

k)

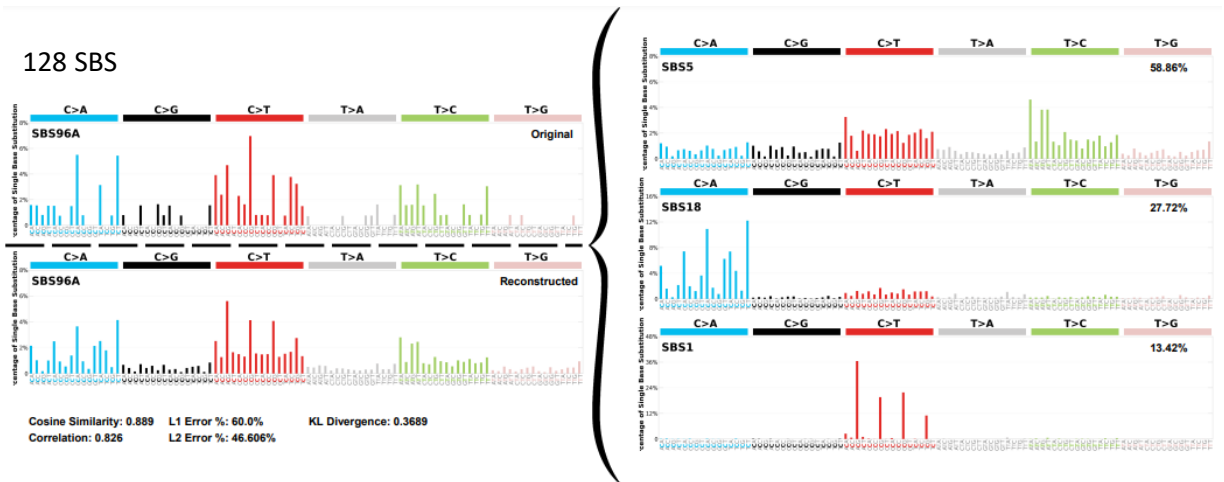

l)

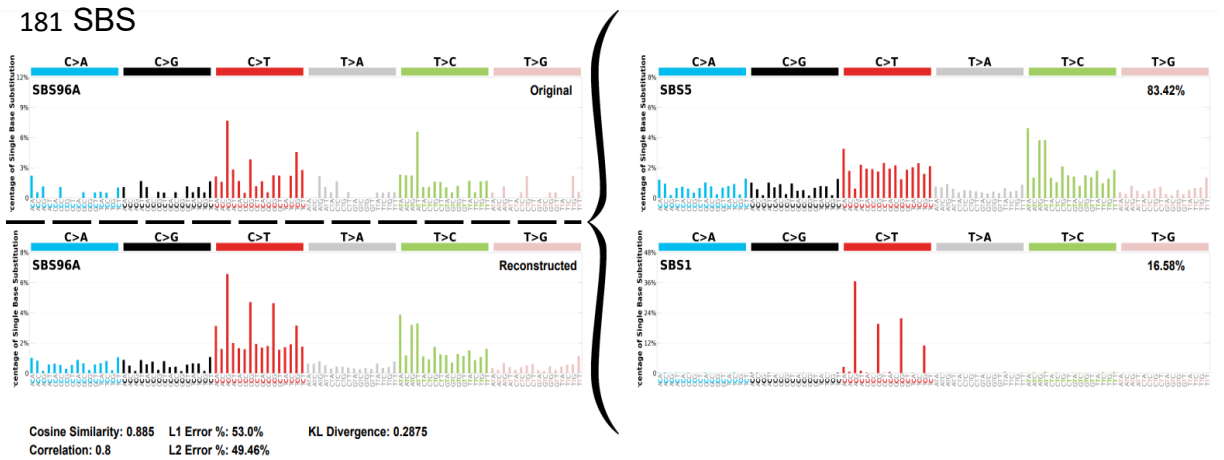

m)

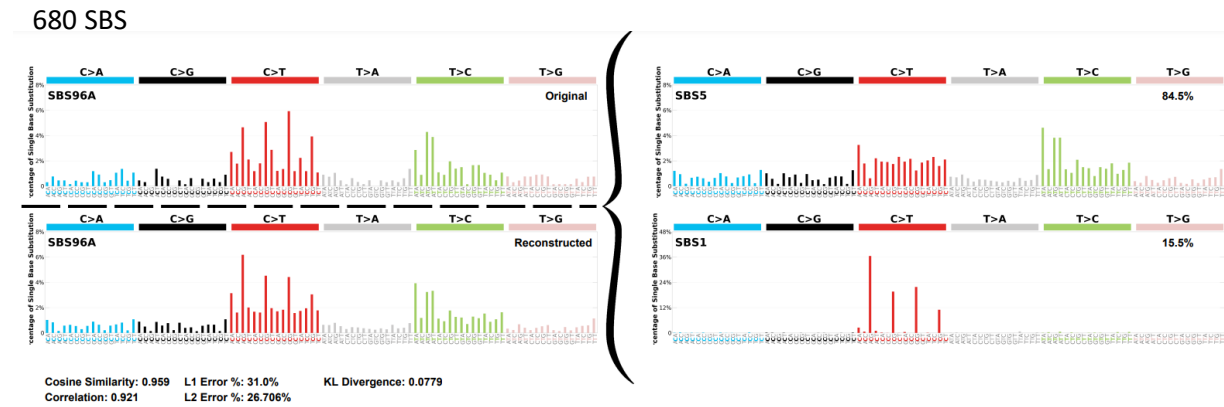

n)

219 SBS

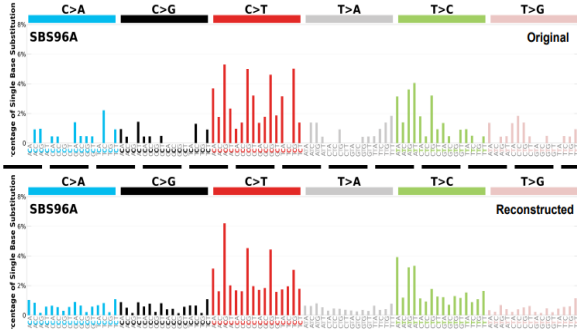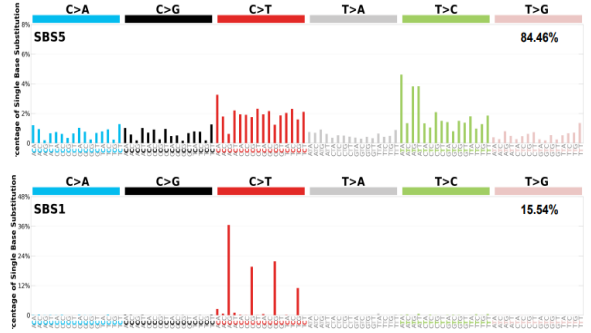

Cosine Similarity: 0.917 L1 Error %: 47.0% KL Divergence: 0.2685  
 Correlation: 0.854 L2 Error %: 37.657%

o)

281 SBS

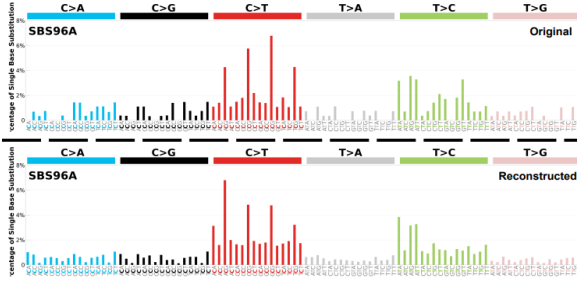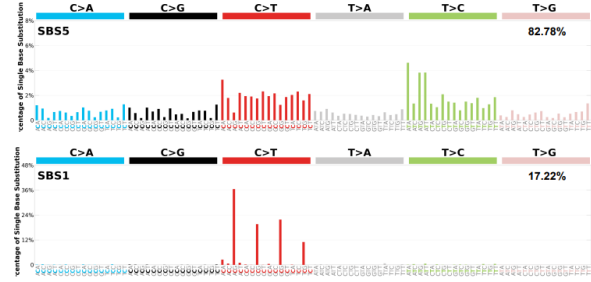

Cosine Similarity: 0.916 L1 Error %: 44.0% KL Divergence: 0.1933  
 Correlation: 0.847 L2 Error %: 38.963%

p)

180 SBS

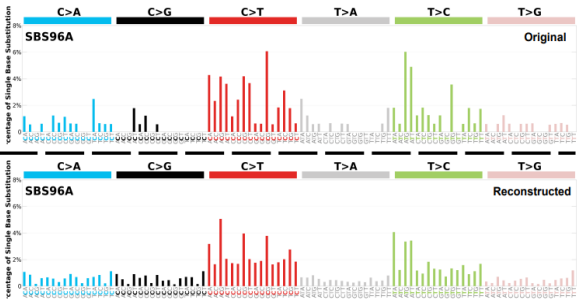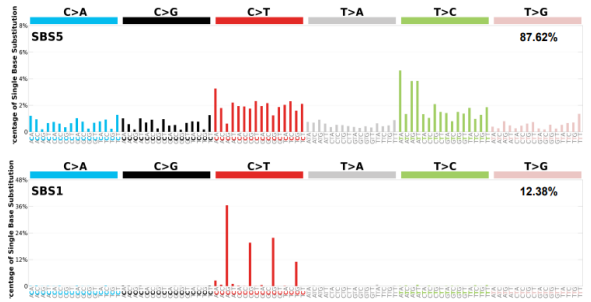

Cosine Similarity: 0.871 L1 Error %: 59.0% KL Divergence: 0.3107  
 Correlation: 0.783 L2 Error %: 48.283%

**Supplementary Figure 5. Proportional activities of SBS signatures derived from mutations phased to carrier and non-carrier parents in *POLE* and *POLD1* families.** a) *POLE* carrier parents, b) *POLE* non-carrier parents, c) *POLD1* carrier parents, d) *POLD1* non-carrier parents. Note the presence of signature 10d in the mutations derived from the *POLE* non-carrier parents. These mutations do not have a clear cause, but were almost all derived from a father who provided DNMs assigned to SBS56, which is formally assigned as an artefact by COSMIC, but closely resembles SBS10d.

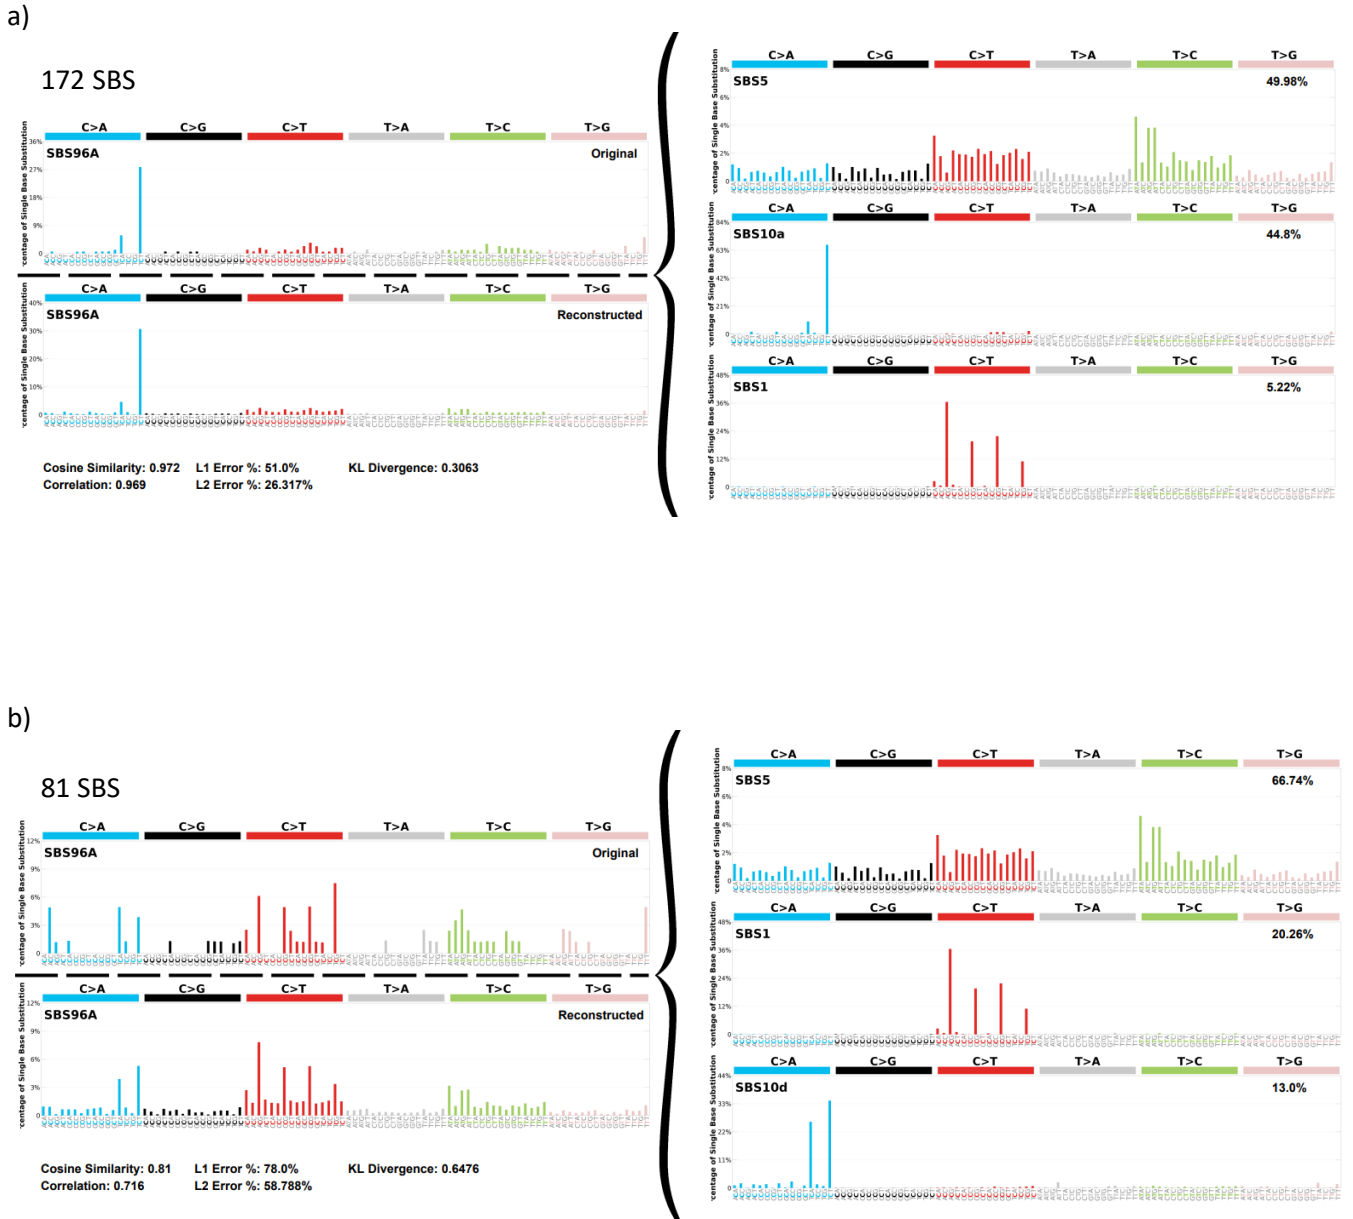

c)

46 SBS

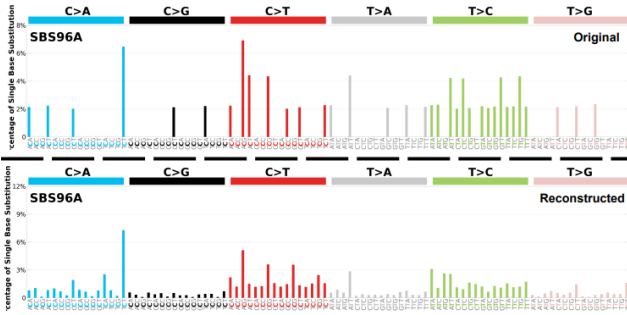

Cosine Similarity: 0.758 L1 Error %: 91.0% KL Divergence: 0.7275  
 Correlation: 0.625 L2 Error %: 64.839%

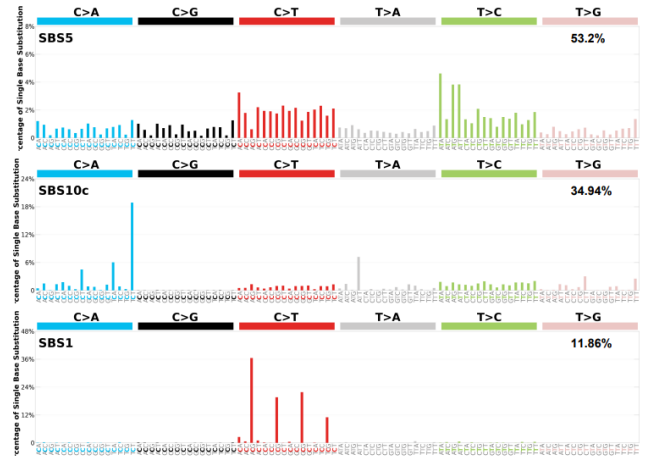

d)

55 SBS

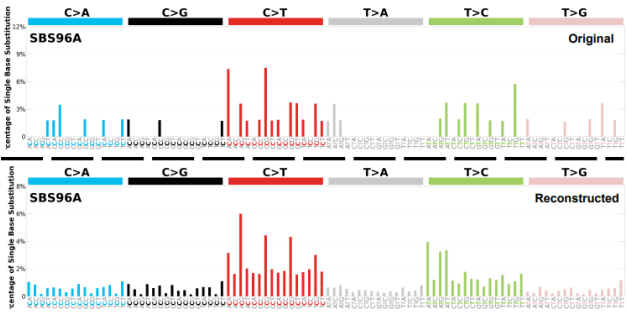

Cosine Similarity: 0.724 L1 Error %: 92.0% KL Divergence: 0.745  
 Correlation: 0.571 L2 Error %: 69.214%

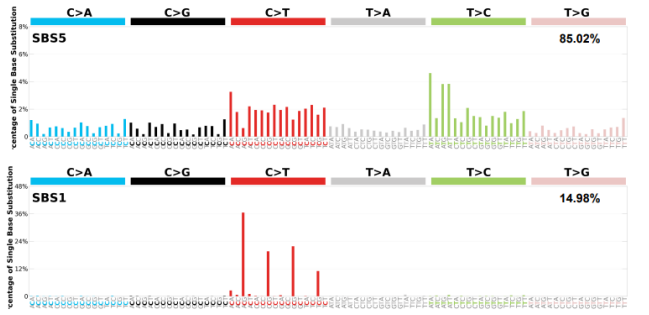

**Supplementary Figure 6. VAF distributions of DNMs of all children.** Shapiro-Wilk test for normality statistic and P value are shown. Note the deviations from a symmetrical distribution centered on VAF=0.5 in a few cases, generally consistent with left skewing owing to detection of a small number of sub-clonal post-zygotic mutations. Nevertheless, *MUTYH\_C:II.1* remains a clear outlier in terms of both VAF distribution and deviation from normality.

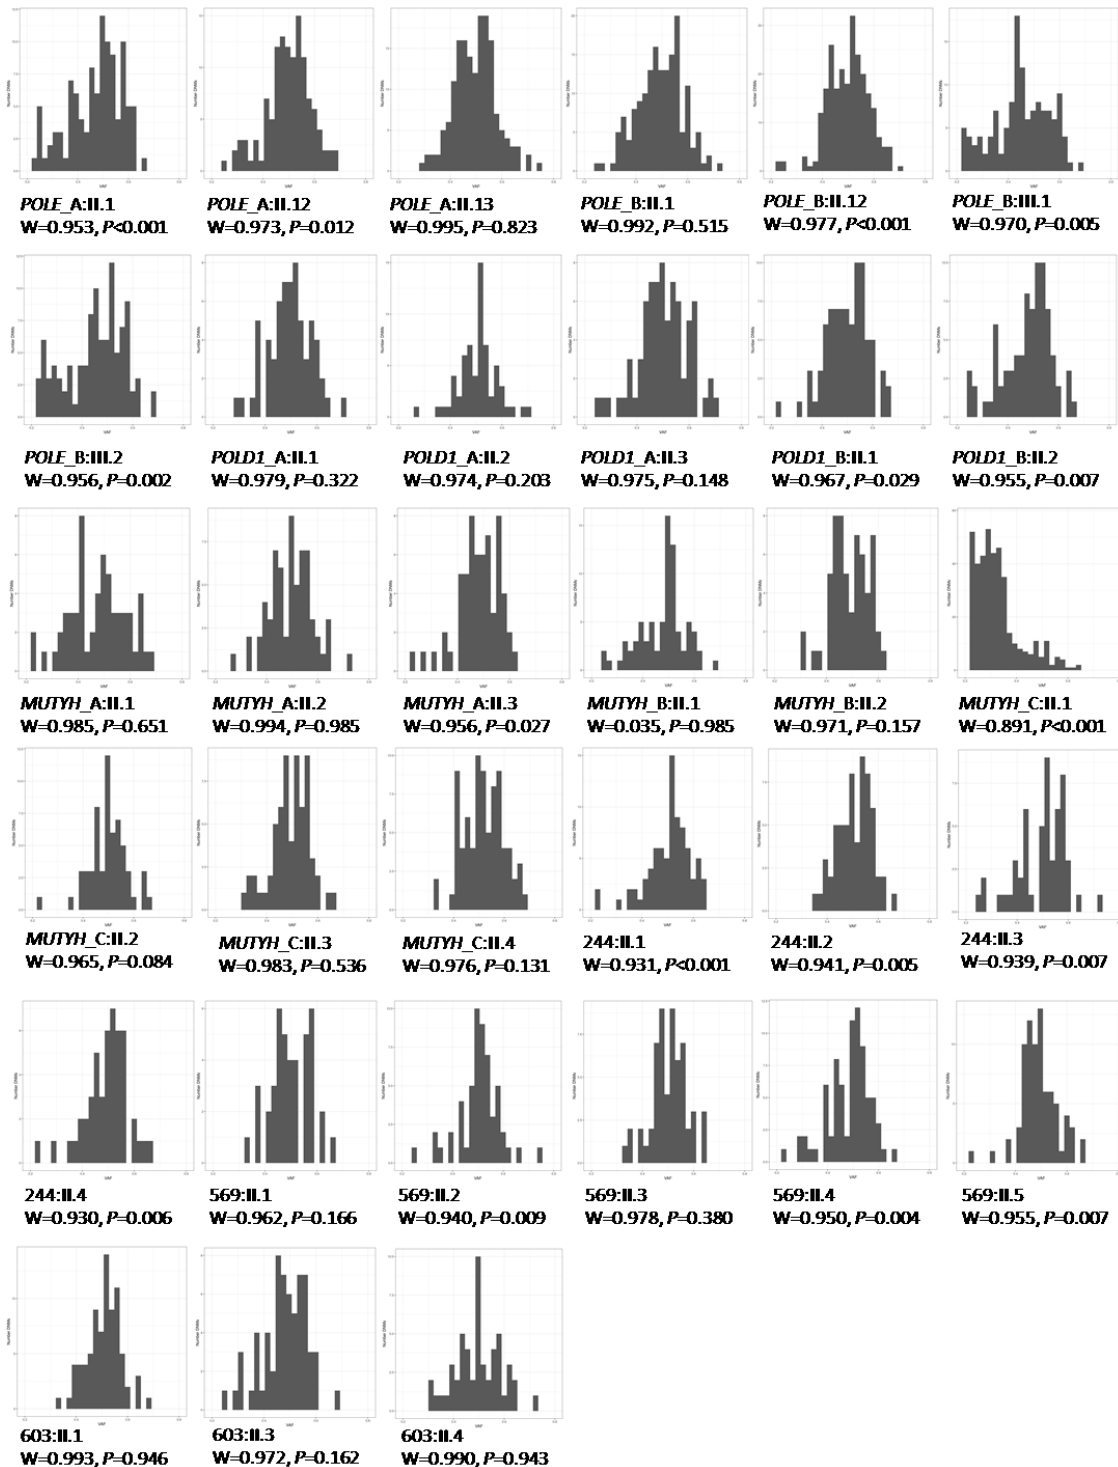

### Supplementary Figure 7. *MUTYH\_C:II.1* analysis.

a) DNM frequency by VAF. For this patient only, we performed an additional analysis in which lower confidence DNMs at lower VAFs were included, in order to investigate the hypothesis that there existed a sub-clonal peak of changes related to oligoclonal haematopoiesis after chemotherapy. Gaussian mixture analysis identified two groups, which we found to correspond to the peaks at VAF~0.23 and VAF~0.48, as shown red and blue in the histogram, with a separation at approximately VAF=0.36-0.40. We surmise that these groups corresponded respectively to a large sub-clonal peak of therapy-associated mutations and a clonal peak of true DNMs. Note that full visual inspection of every DNM was not performed for this large set of 960 mutations, so burdens are not equivalent to the high-confidence set of DNMs shown for all study patients in Table 1.

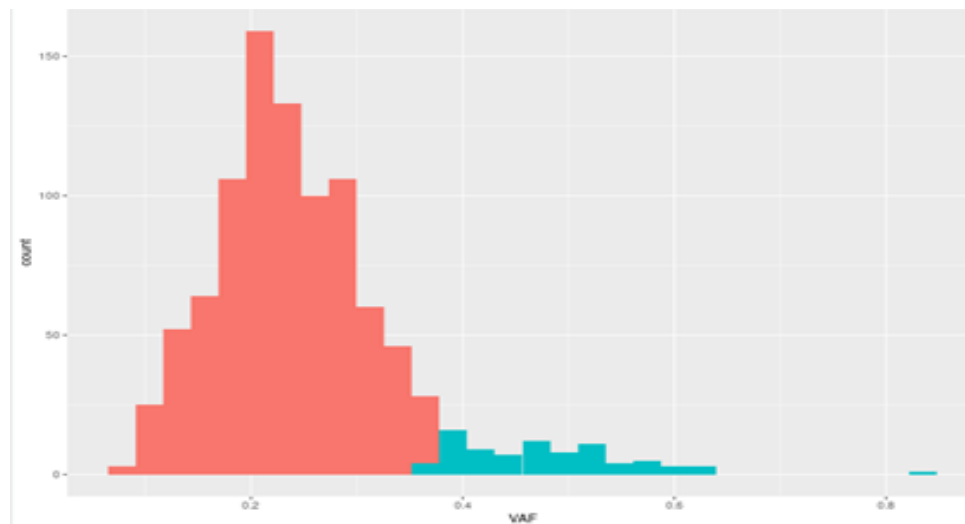

b) Cosine similarities of DNMs from all children in the study to various reported 5- fluorouracil signatures. There is no enrichment of these signatures in *MUTYH\_C:II.1*. Signatures are derived from COSMIC (<https://cancer.sanger.ac.uk/signatures/>) or from {Pich, 2021 #42}.

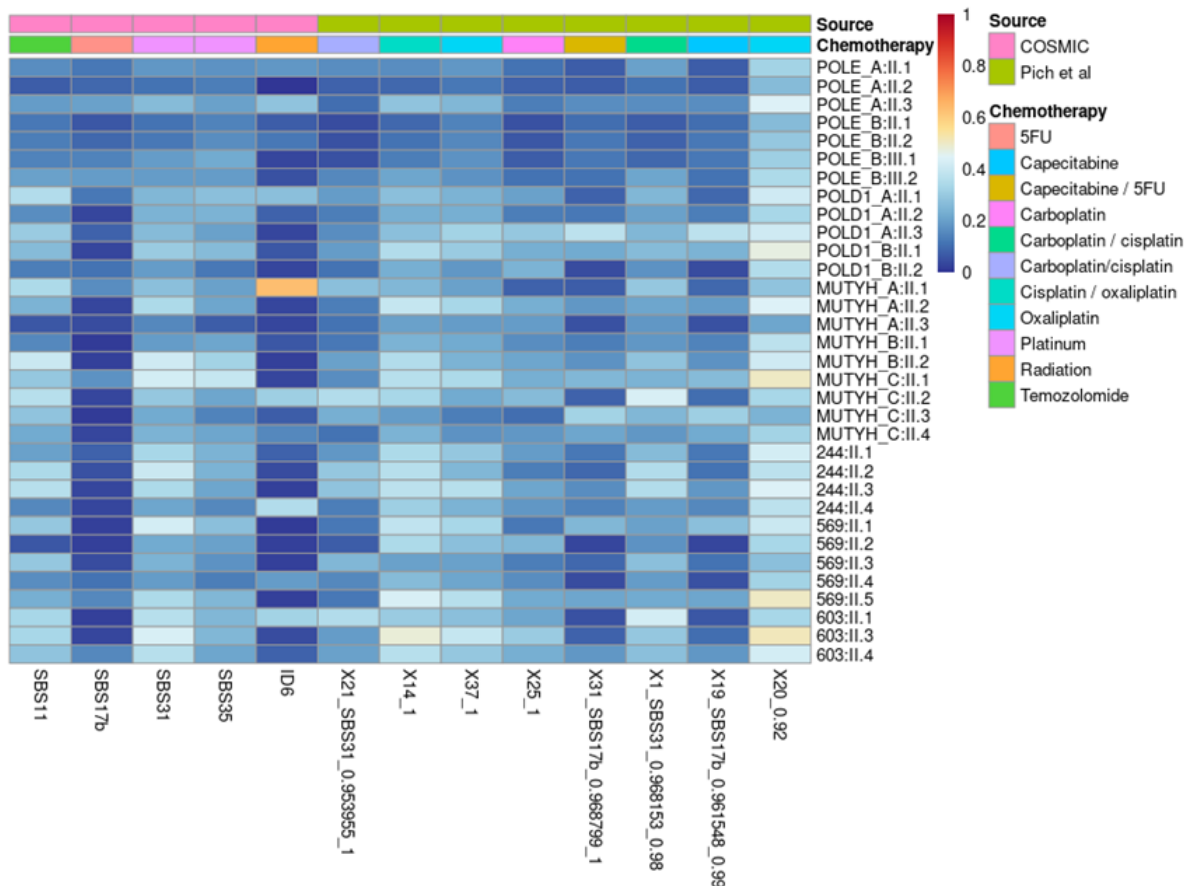



**Supplementary Table 1. Number of variants remaining at each stage of calling and filtering.**

| Child ID     | GATK germline variants | Raw DeNovo Gear | Called as variant in GATK | Not called as variant in parents | VAF 0.3-0.7 | <1% read support in both parents | Exclude simple repeats | Exclude segmental duplications | Remove HLA region | VAF<0.01 in gnomAD | Validated in IGV |
|--------------|------------------------|-----------------|---------------------------|----------------------------------|-------------|----------------------------------|------------------------|--------------------------------|-------------------|--------------------|------------------|
| POLE_A:II.1  | 2531366                | 1756            | 1292                      | 1264                             | 442         | 404                              | 226                    | 180                            | 180               | 179                | 97               |
| POLE_A:II.2  | 2542600                | 1518            | 1108                      | 1107                             | 368         | 337                              | 186                    | 149                            | 149               | 149                | 120              |
| POLE_A:II.3  | 2533887                | 1659            | 1038                      | 1037                             | 396         | 363                              | 212                    | 188                            | 188               | 188                | 163              |
| POLE_B:II.1  | 2464024                | 1401            | 1065                      | 1065                             | 321         | 299                              | 207                    | 192                            | 192               | 192                | 161              |
| POLE_B:II.2  | 2485269                | 1390            | 938                       | 938                              | 400         | 375                              | 275                    | 256                            | 256               | 255                | 239              |
| POLE_B:III.1 | 2495072                | 1468            | 942                       | 941                              | 301         | 278                              | 165                    | 150                            | 150               | 150                | 114              |
| POLE_B:III.2 | 2489240                | 1439            | 1047                      | 1041                             | 296         | 270                              | 146                    | 123                            | 123               | 123                | 88               |
| POLD1_A:II.1 | 2532151                | 1334            | 1004                      | 1004                             | 235         | 222                              | 122                    | 103                            | 103               | 103                | 63               |
| POLD1_A:II.2 | 2510682                | 1120            | 819                       | 819                              | 248         | 228                              | 92                     | 78                             | 78                | 78                 | 62               |
| POLD1_A:II.3 | 2512732                | 1110            | 843                       | 843                              | 251         | 238                              | 110                    | 97                             | 97                | 97                 | 71               |
| POLD1_B:II.1 | 2514464                | 1484            | 1180                      | 1180                             | 300         | 276                              | 149                    | 110                            | 110               | 110                | 83               |
| POLD1_B:II.2 | 2520854                | 1813            | 1239                      | 1239                             | 331         | 311                              | 146                    | 138                            | 138               | 138                | 76               |
| MUTYH_A:II.1 | 2565987                | 2125            | 1874                      | 1857                             | 307         | 285                              | 148                    | 101                            | 101               | 101                | 57               |
| MUTYH_A:II.2 | 2560630                | 1527            | 977                       | 973                              | 275         | 259                              | 129                    | 94                             | 94                | 94                 | 63               |
| MUTYH_A:II.3 | 2563090                | 1319            | 944                       | 944                              | 244         | 230                              | 118                    | 89                             | 89                | 89                 | 59               |
| MUTYH_B:II.1 | 2534270                | 1560            | 1258                      | 1258                             | 268         | 244                              | 143                    | 121                            | 121               | 121                | 76               |
| MUTYH_B:II.2 | 2515758                | 1175            | 952                       | 952                              | 232         | 213                              | 109                    | 102                            | 102               | 102                | 60               |
| MUTYH_C:II.1 | 2491493                | 2077            | 1744                      | 1716                             | 537         | 513                              | 315                    | 288                            | 288               | 288                | 212              |
| MUTYH_C:II.2 | 2523298                | 1374            | 868                       | 868                              | 299         | 269                              | 122                    | 104                            | 104               | 104                | 59               |
| MUTYH_C:II.3 | 2506464                | 1163            | 644                       | 643                              | 244         | 230                              | 121                    | 94                             | 94                | 94                 | 64               |
| MUTYH_C:II.4 | 2514724                | 1165            | 856                       | 855                              | 313         | 290                              | 139                    | 118                            | 118               | 118                | 81               |
| 244:II.1     | 2518039                | 1134            | 791                       | 790                              | 299         | 281                              | 159                    | 133                            | 133               | 133                | 79               |
| 244:II.2     | 2515097                | 1125            | 823                       | 822                              | 250         | 230                              | 105                    | 81                             | 81                | 81                 | 62               |
| 244:II.3     | 2505711                | 1270            | 895                       | 893                              | 260         | 231                              | 108                    | 83                             | 83                | 83                 | 50               |
| 244:II.4     | 2506701                | 1452            | 1118                      | 1091                             | 267         | 243                              | 105                    | 79                             | 79                | 79                 | 47               |
| 569:II.1     | 2508402                | 1124            | 662                       | 659                              | 211         | 195                              | 78                     | 63                             | 63                | 63                 | 42               |
| 569:II.2     | 2505892                | 1111            | 696                       | 693                              | 218         | 199                              | 85                     | 67                             | 67                | 67                 | 53               |
| 569:II.3     | 2519274                | 1194            | 668                       | 667                              | 208         | 186                              | 89                     | 73                             | 72                | 72                 | 58               |
| 569:II.4     | 2497746                | 1419            | 709                       | 706                              | 232         | 220                              | 105                    | 88                             | 88                | 88                 | 75               |
| 569:II.5     | 2499785                | 1445            | 829                       | 807                              | 307         | 286                              | 125                    | 104                            | 104               | 104                | 78               |
| 603:II.1     | 2513538                | 1789            | 1211                      | 1208                             | 295         | 261                              | 130                    | 108                            | 108               | 108                | 80               |
| 603:II.3     | 2535778                | 1635            | 1155                      | 1122                             | 323         | 290                              | 115                    | 92                             | 92                | 92                 | 62               |
| 603:II.4     | 2510779                | 1344            | 1078                      | 1076                             | 260         | 240                              | 86                     | 72                             | 72                | 72                 | 51               |

**Supplementary Table 2. Six-channel DNM spectra in *POLE*, *POLD1*, *MUTYH* and control families.** Total numbers of DNMs in individuals from each family type, together with the mean number, are shown.

|         | POLE<br>(n=7) | POLD1<br>(n=5) | MUTYH bi-<br>allelic (n=2) | MUTYH mono-<br>allelic (n=6) | Controls<br>(n=12) |
|---------|---------------|----------------|----------------------------|------------------------------|--------------------|
| C:G>A:T | 272           | 56             | 32                         | 24                           | 66                 |
| C:G>G:C | 36            | 21             | 11                         | 34                           | 50                 |
| C:G>T:A | 228           | 103            | 48                         | 135                          | 275                |
| T:A>A:T | 44            | 25             | 7                          | 25                           | 55                 |
| T:A>C:G | 215           | 95             | 27                         | 99                           | 174                |
| T:A>G:C | 145           | 26             | 3                          | 30                           | 59                 |
